# Supplementary material
Source: publisher figshare collection journal article supplement (https://tandf.figshare.com/ndownloader/files/20961519)
Supplement: Supplementary file 1 [file 20961519]

| **Supplemental Table 1: Exposures in drug classes of interest, total and by outcome** | | | |
| --- | --- | --- | --- |
|  |  |  |  |
| **Class** | **Total Number of Exposures** | **ACVE** | **Deaths** |
| **Non-Opioid Analgesics** | 3043 | 42* | 5 |
| **Antidepressants** | 1848 | 57* | 5 |
| **Anticholinergics** | 1488 | 23 | 3 |
| **Cardiovascular drugs** | 1138 | 67* | 6 |
| **Sedative Hypnotics** | 1127 | 27 | 3 |
|  |  |  |  |
| **Opioids** | 773 | 40* | 9* |
| **Sympathomimetic** | 858 | 20 | 6* |
| * denote statistically significant categories (p < 0.05) | |  |  |

| **Supplemental Table 2: Data capture for included vs. excluded patients in replication of adult AVCE model** | | | | | | |
| --- | --- | --- | --- | --- | --- | --- |
|  |  |  |  |  |  |  |
| **Variable** | **Category** | **Excluded (Missing any variable*)** | | **Included (All variables recorded*)** | | **p-value** |
|  |  | N | % | N | % |  |
| **N** |  | 11270 |  | 1827 |  |  |
| **Case Characteristics** |  |  |  |  |  |  |
| **Age (years)** | <2 | 1618 | 14.4 | 86 | 4.7 | <0.001 |
|  | 2-6 | 2164 | 19.2 | 146 | 8 |  |
|  | 7-12 | 965 | 8.6 | 125 | 6.8 |  |
|  | 13-18 | 6523 | 57.9 | 1470 | 80.5 |  |
|  |  |  |  |  |  |  |
| **Sex** | Female | 6464 | 57.7 | 1207 | 66.1 | <0.001 |
|  |  |  |  |  |  |  |
| **Race** | Black | 414 | 15 | 295 | 19.4 | 0.002 |
|  | Asian | 59 | 2.1 | 33 | 2.2 |  |
|  | Other | 338 | 12.3 | 145 | 9.5 |  |
|  | White | 1944 | 70.6 | 1051 | 69 |  |
|  |  |  |  |  |  |  |
| **Ethnicity** | Hispanic/Latino | 538 | 20.3 | 246 | 16.7 | 0.005 |
|  |  |  |  |  |  |  |
| **Number of unique drugs in exposure, mean (SD)** |  | 1.4 (1.1) |  | 1.5 (1.0) |  | <0.001 |
|  |  |  |  |  |  |  |
| **Cardiovascular Drug Exposure** |  | 956 (8.5%) |  | 182 | 10.0 | 0.037 |
|  |  |  |  |  |  |  |
| **Opioid Exposure** |  | 673 (6.0%) |  | 100 | 5.5 | 0.40 |
| **Outcomes** |  |  |  |  |  |  |
| **ACVE** |  | 178 | 1.6 | 100 | 5.5 | <0.001 |
|  |  |  |  |  |  |  |
| **Shock** |  | 140 | 1.2 | 54 | 3.0 | <0.001 |
|  |  |  |  |  |  |  |
| **Ventricular Dysrhythmias** | | 37 | 0.3 | 8 | 0.4 | 0.46 |
|  |  |  |  |  |  |  |
| **Myocardial Injury** |  | 8 | 0.1 | 45 | 2.5 | <0.001 |
|  |  |  |  |  |  |  |
| **CPR** |  | 30 | 0.3 | 5 | 0.3 | 0.95 |
|  |  |  |  |  |  |  |
| **Death** |  | 33 | 0.3 | 6 | 0.3 | 0.80 |
| ***Required variables: Age, QTc Interval, and serum bicarbonate concentration** | | | | | | |
